# Supplementary material for: The Impact of Long-Term Online Learning on Internet Addiction Symptoms among Depressed Secondary School Students: Insights from a Cross-Panel Network Analysis
Source: MDPI journal article supplement (doi:10.3390/bs13070520), 2023-06-21
Supplement: s1 [file s1]

Table S1. LASSO cross-lagged regression matrix of all IAT items. Each number in the matrix represents the regression coefficient of the item in the same row on its left side (wave 1) predicting the item in the same column on its upper side (wave 2).

|    | IAT1 | IAT2 | IAT3 | IAT4 | IAT5 | IAT6   | IAT7 | IAT8   | IAT9   | IAT10 | IAT11 | IAT12 | IAT13 | IAT14  | IAT15 | IAT16 | IAT17 | IAT18 | IAT19 | IAT20  |
|----|------|------|------|------|------|--------|------|--------|--------|-------|-------|-------|-------|--------|-------|-------|-------|-------|-------|--------|
| 1  | 0.23 | 0.09 | 0.01 | 0.00 | 0.00 | 0.06   | 0.01 | 0.02   | 0.06   | 0.04  | 0.00  | 0.10  | 0.03  | 0.03   | 0.00  | 0.00  | 0.04  | 0.00  | 0.00  | 0.08   |
| 2  | 0.07 | 0.10 | 0.05 | 0.00 | 0.01 | 0.14   | 0.00 | 0.07   | 0.00   | 0.00  | 0.02  | 0.00  | 0.05  | 0.01   | 0.00  | 0.05  | 0.00  | 0.02  | 0.00  | 0.03   |
| 3  | 0.00 | 0.00 | 0.13 | 0.00 | 0.00 | 0.06   | 0.00 | 0.07   | 0.00   | 0.00  | 0.00  | 0.00  | 0.00  | 0.06   | 0.02  | 0.07  | 0.00  | 0.00  | 0.08  | 0.10   |
| 4  | 0.00 | 0.00 | 0.00 | 0.26 | 0.00 | 0.12   | 0.09 | 0.09   | 0.02   | 0.00  | 0.00  | 0.04  | 0.00  | 0.05   | 0.00  | 0.00  | 0.00  | 0.00  | 0.00  | 0.00   |
| 5  | 0.00 | 0.00 | 0.04 | 0.00 | 0.27 | 0.06   | 0.00 | 0.02   | 0.00   | 0.00  | 0.00  | 0.00  | 0.00  | 0.00   | 0.01  | 0.04  | 0.00  | 0.03  | 0.00  | 0.00   |
| 6  | 0.00 | 0.00 | 0.01 | 0.00 | 0.00 | 0.15   | 0.04 | 0.09   | 0.00   | 0.00  | 0.00  | 0.00  | 0.00  | 0.00   | 0.00  | 0.00  | 0.00  | 0.00  | 0.00  | 0.00   |
| 7  | 0.00 | 0.00 | 0.00 | 0.00 | 0.00 | (0.16) | 0.00 | (0.09) | (0.12) | 0.00  | 0.00  | 0.00  | 0.00  | (0.05) | 0.00  | 0.00  | 0.00  | 0.00  | 0.00  | (0.05) |
| 8  | 0.00 | 0.00 | 0.00 | 0.00 | 0.01 | (0.02) | 0.00 | 0.05   | 0.04   | 0.00  | 0.00  | 0.00  | 0.00  | 0.00   | 0.00  | 0.00  | 0.03  | 0.00  | 0.00  | 0.00   |
| 9  | 0.00 | 0.00 | 0.00 | 0.00 | 0.00 | 0.00   | 0.01 | 0.00   | 0.21   | 0.00  | 0.00  | 0.00  | 0.00  | 0.00   | 0.00  | 0.00  | 0.00  | 0.00  | 0.00  | 0.00   |
| 10 | 0.00 | 0.00 | 0.00 | 0.00 | 0.00 | 0.00   | 0.00 | 0.00   | 0.06   | 0.20  | 0.00  | 0.00  | 0.00  | 0.00   | 0.00  | 0.00  | 0.00  | 0.00  | 0.00  | 0.00   |
| 11 | 0.00 | 0.06 | 0.00 | 0.00 | 0.03 | 0.08   | 0.03 | 0.07   | 0.00   | 0.00  | 0.14  | 0.05  | 0.10  | 0.00   | 0.04  | 0.05  | 0.00  | 0.05  | 0.06  | 0.00   |
| 12 | 0.00 | 0.00 | 0.00 | 0.00 | 0.00 | (0.11) | 0.00 | 0.00   | 0.00   | 0.00  | 0.00  | 0.06  | 0.00  | 0.00   | 0.00  | 0.00  | 0.00  | 0.00  | 0.00  | (0.01) |
| 13 | 0.00 | 0.00 | 0.00 | 0.00 | 0.00 | (0.15) | 0.00 | (0.02) | 0.00   | 0.00  | 0.00  | 0.00  | 0.00  | 0.00   | 0.00  | 0.00  | 0.00  | 0.00  | 0.00  | 0.00   |
| 14 | 0.00 | 0.00 | 0.00 | 0.00 | 0.00 | (0.02) | 0.00 | (0.06) | 0.00   | 0.00  | 0.00  | 0.01  | 0.00  | 0.20   | 0.02  | 0.00  | 0.00  | 0.00  | 0.00  | 0.00   |
| 15 | 0.00 | 0.00 | 0.00 | 0.00 | 0.00 | 0.00   | 0.00 | 0.00   | 0.00   | 0.00  | 0.00  | 0.00  | 0.00  | 0.00   | 0.00  | 0.00  | 0.00  | 0.00  | 0.00  | 0.00   |
| 16 | 0.00 | 0.01 | 0.00 | 0.00 | 0.00 | 0.00   | 0.04 | 0.08   | 0.06   | 0.00  | 0.06  | 0.03  | 0.04  | 0.00   | 0.00  | 0.12  | 0.00  | 0.02  | 0.07  | 0.01   |
| 17 | 0.00 | 0.01 | 0.00 | 0.00 | 0.06 | 0.13   | 0.05 | 0.07   | 0.00   | 0.00  | 0.00  | 0.00  | 0.01  | 0.00   | 0.00  | 0.00  | 0.13  | 0.00  | 0.00  | 0.00   |
| 18 | 0.00 | 0.04 | 0.00 | 0.00 | 0.00 | 0.10   | 0.07 | 0.04   | 0.00   | 0.00  | 0.01  | 0.00  | 0.12  | 0.00   | 0.04  | 0.00  | 0.05  | 0.19  | 0.00  | 0.02   |
| 19 | 0.00 | 0.00 | 0.04 | 0.00 | 0.00 | (0.08) | 0.00 | (0.10) | 0.00   | 0.00  | 0.00  | 0.00  | 0.00  | 0.00   | 0.00  | 0.01  | 0.00  | 0.00  | 0.08  | 0.00   |
| 20 | 0.00 | 0.00 | 0.00 | 0.00 | 0.00 | 0.14   | 0.00 | 0.11   | 0.00   | 0.00  | 0.03  | 0.04  | 0.01  | 0.11   | 0.06  | 0.00  | 0.00  | 0.00  | 0.00  | 0.26   |

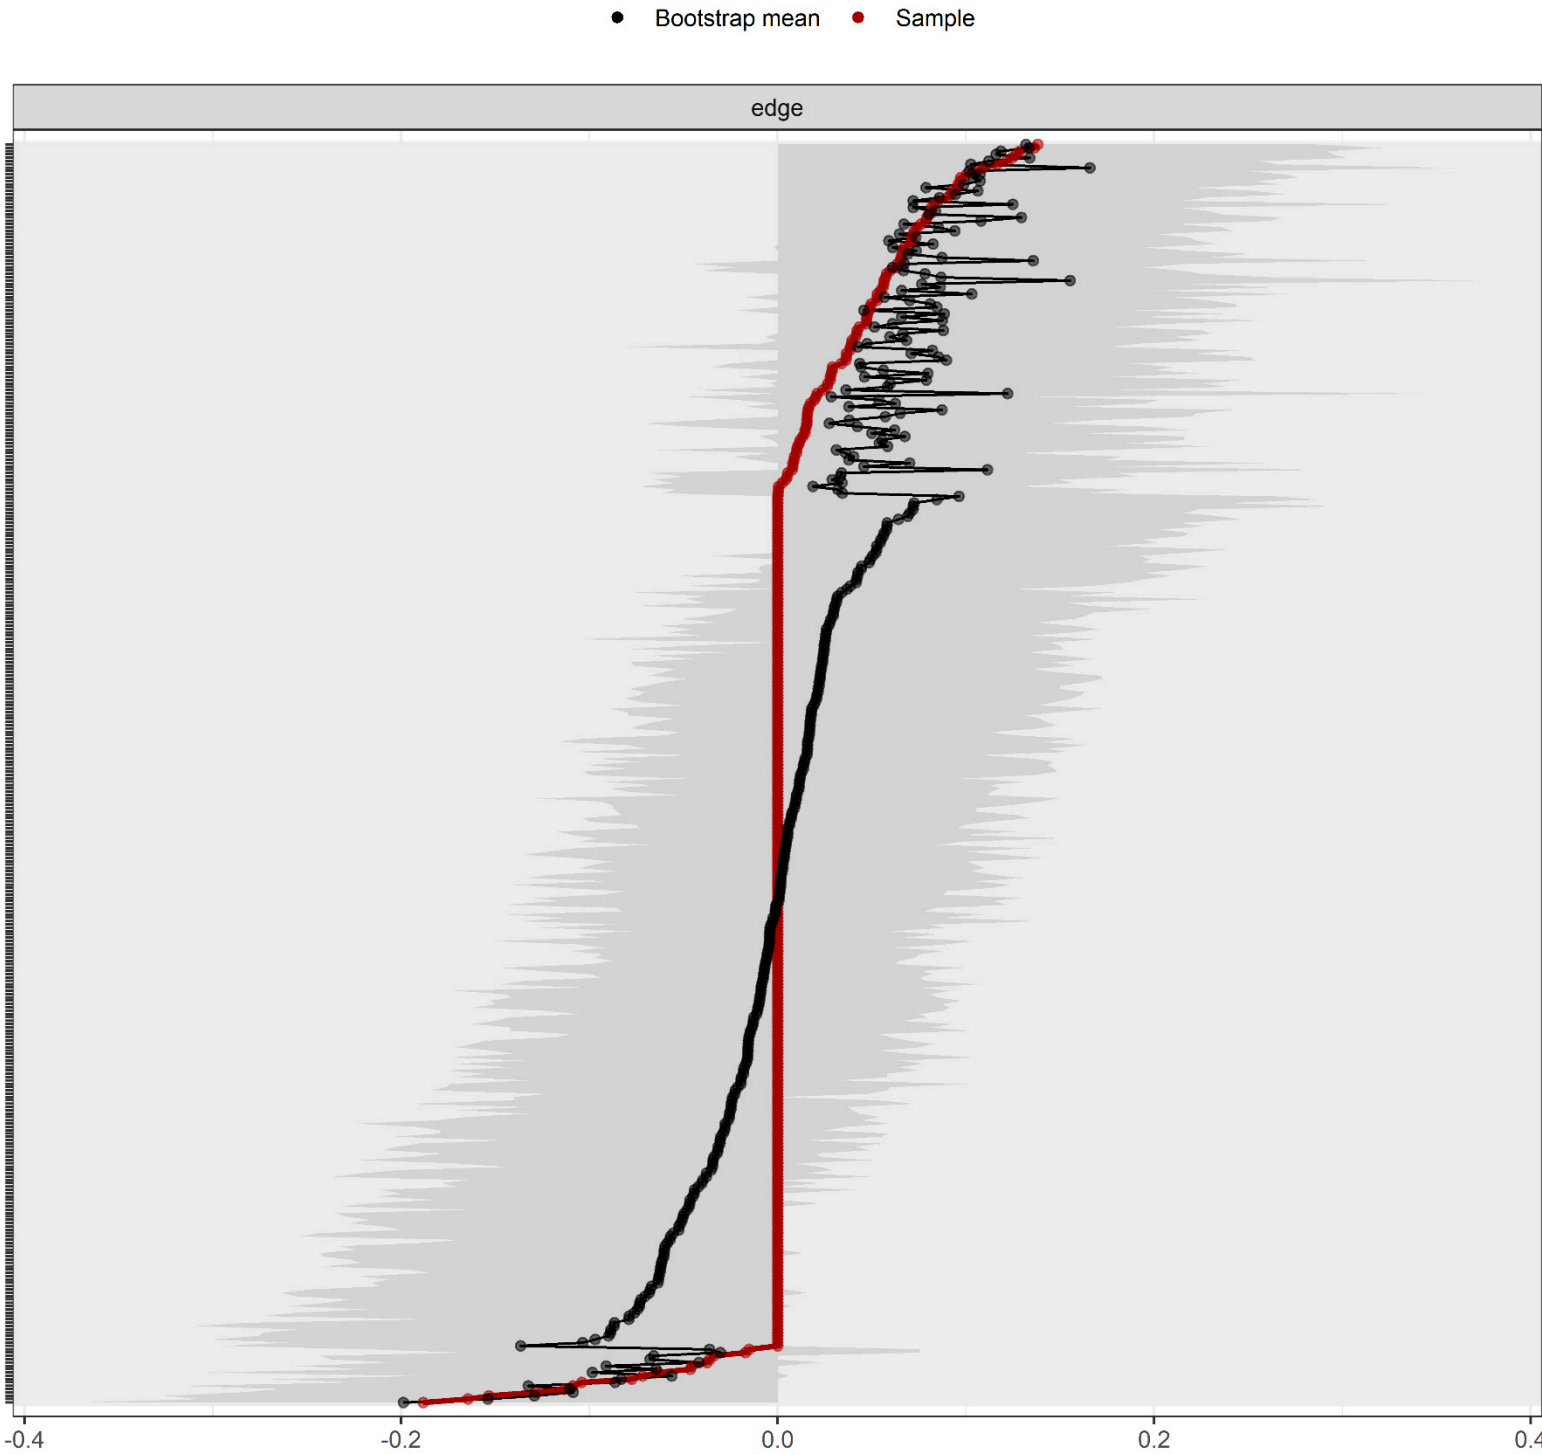

Figure S1. Nonparametric bootstrapped confidence intervals of estimated edges for cross-sectional networks. The red line represents the estimated edge, while the dark area indicates the 95% bootstrap confidence interval.

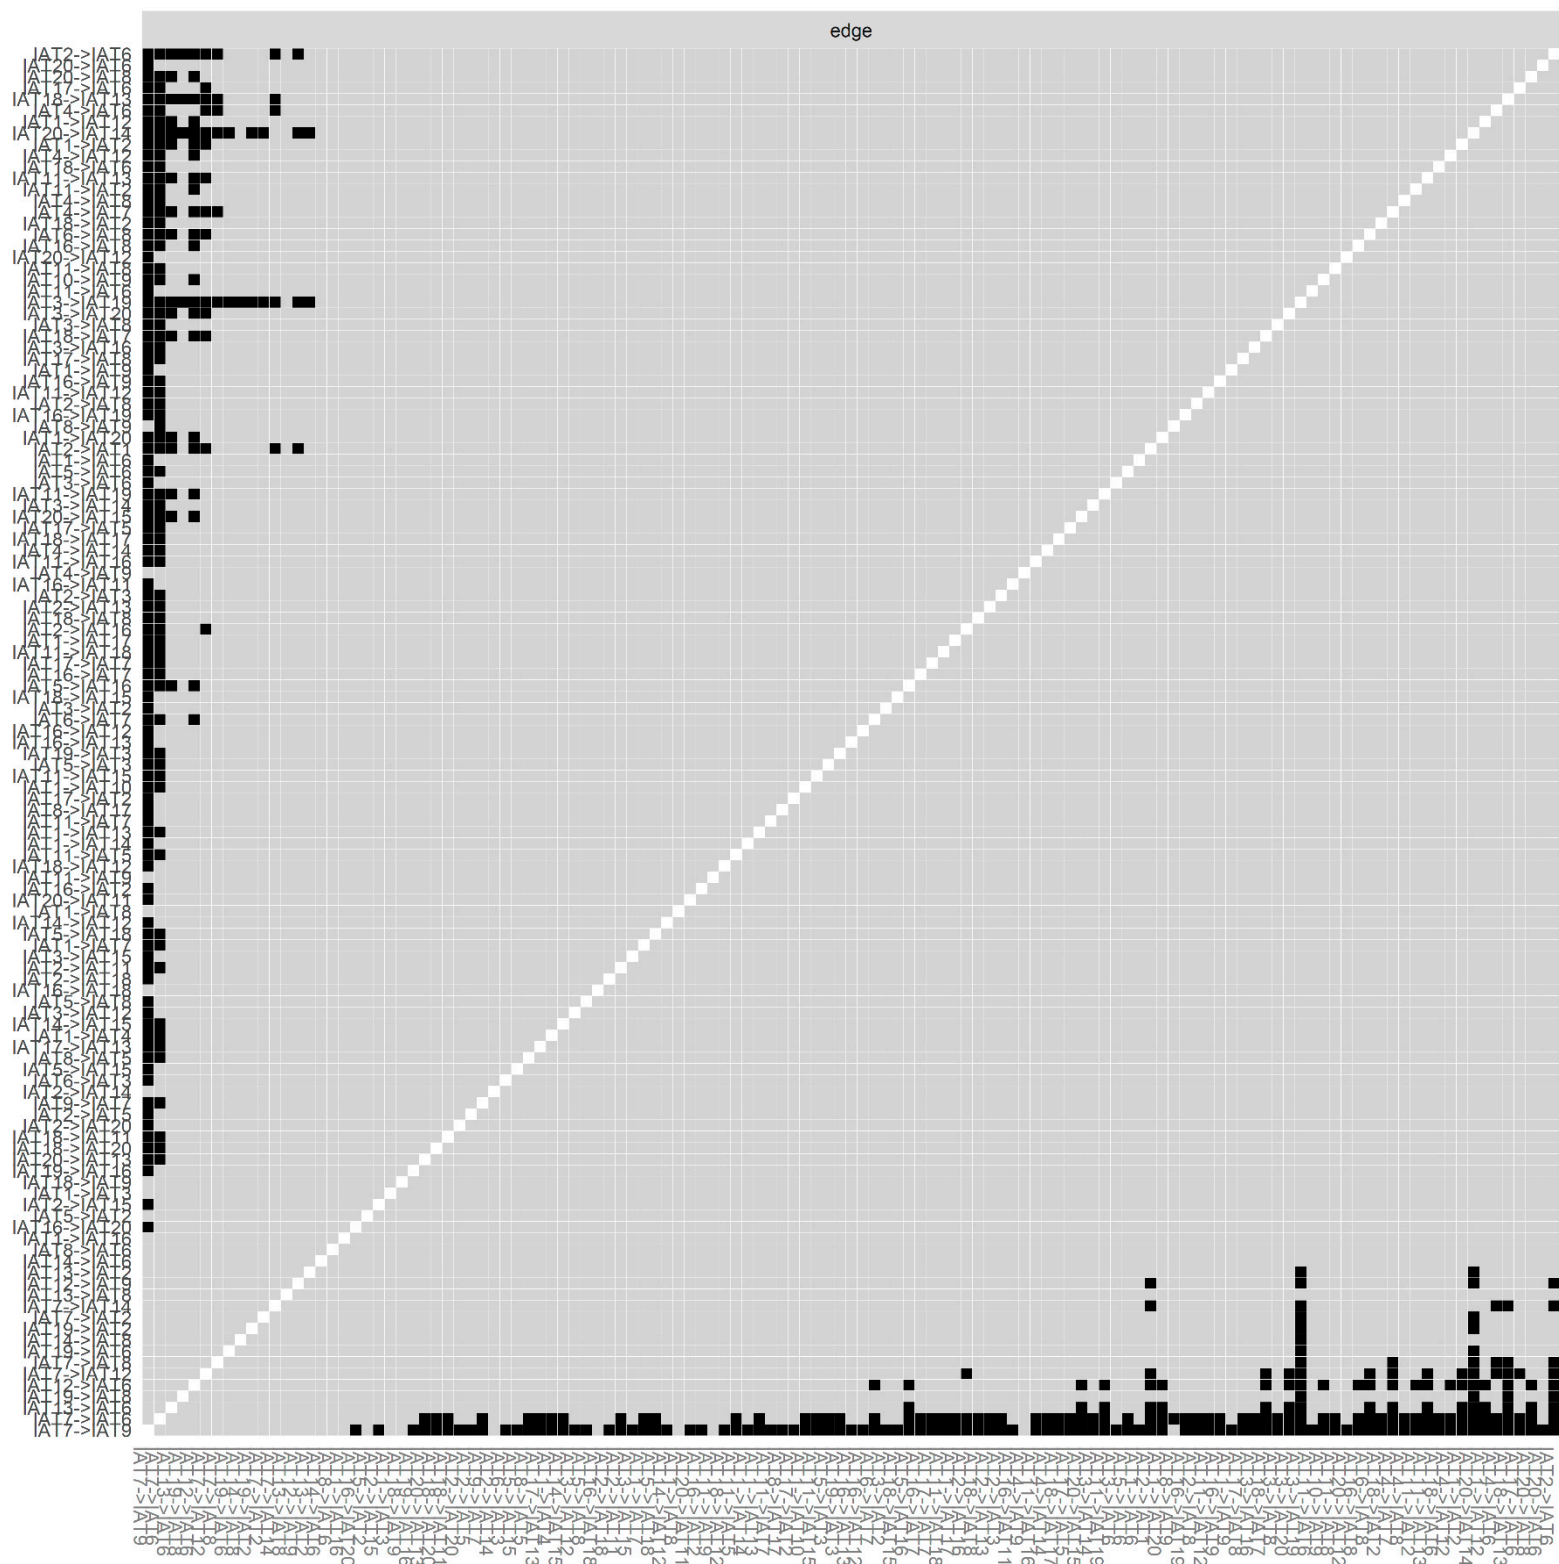

Figure S2. Bootstrapped stability test for cross-lagged edge weights.

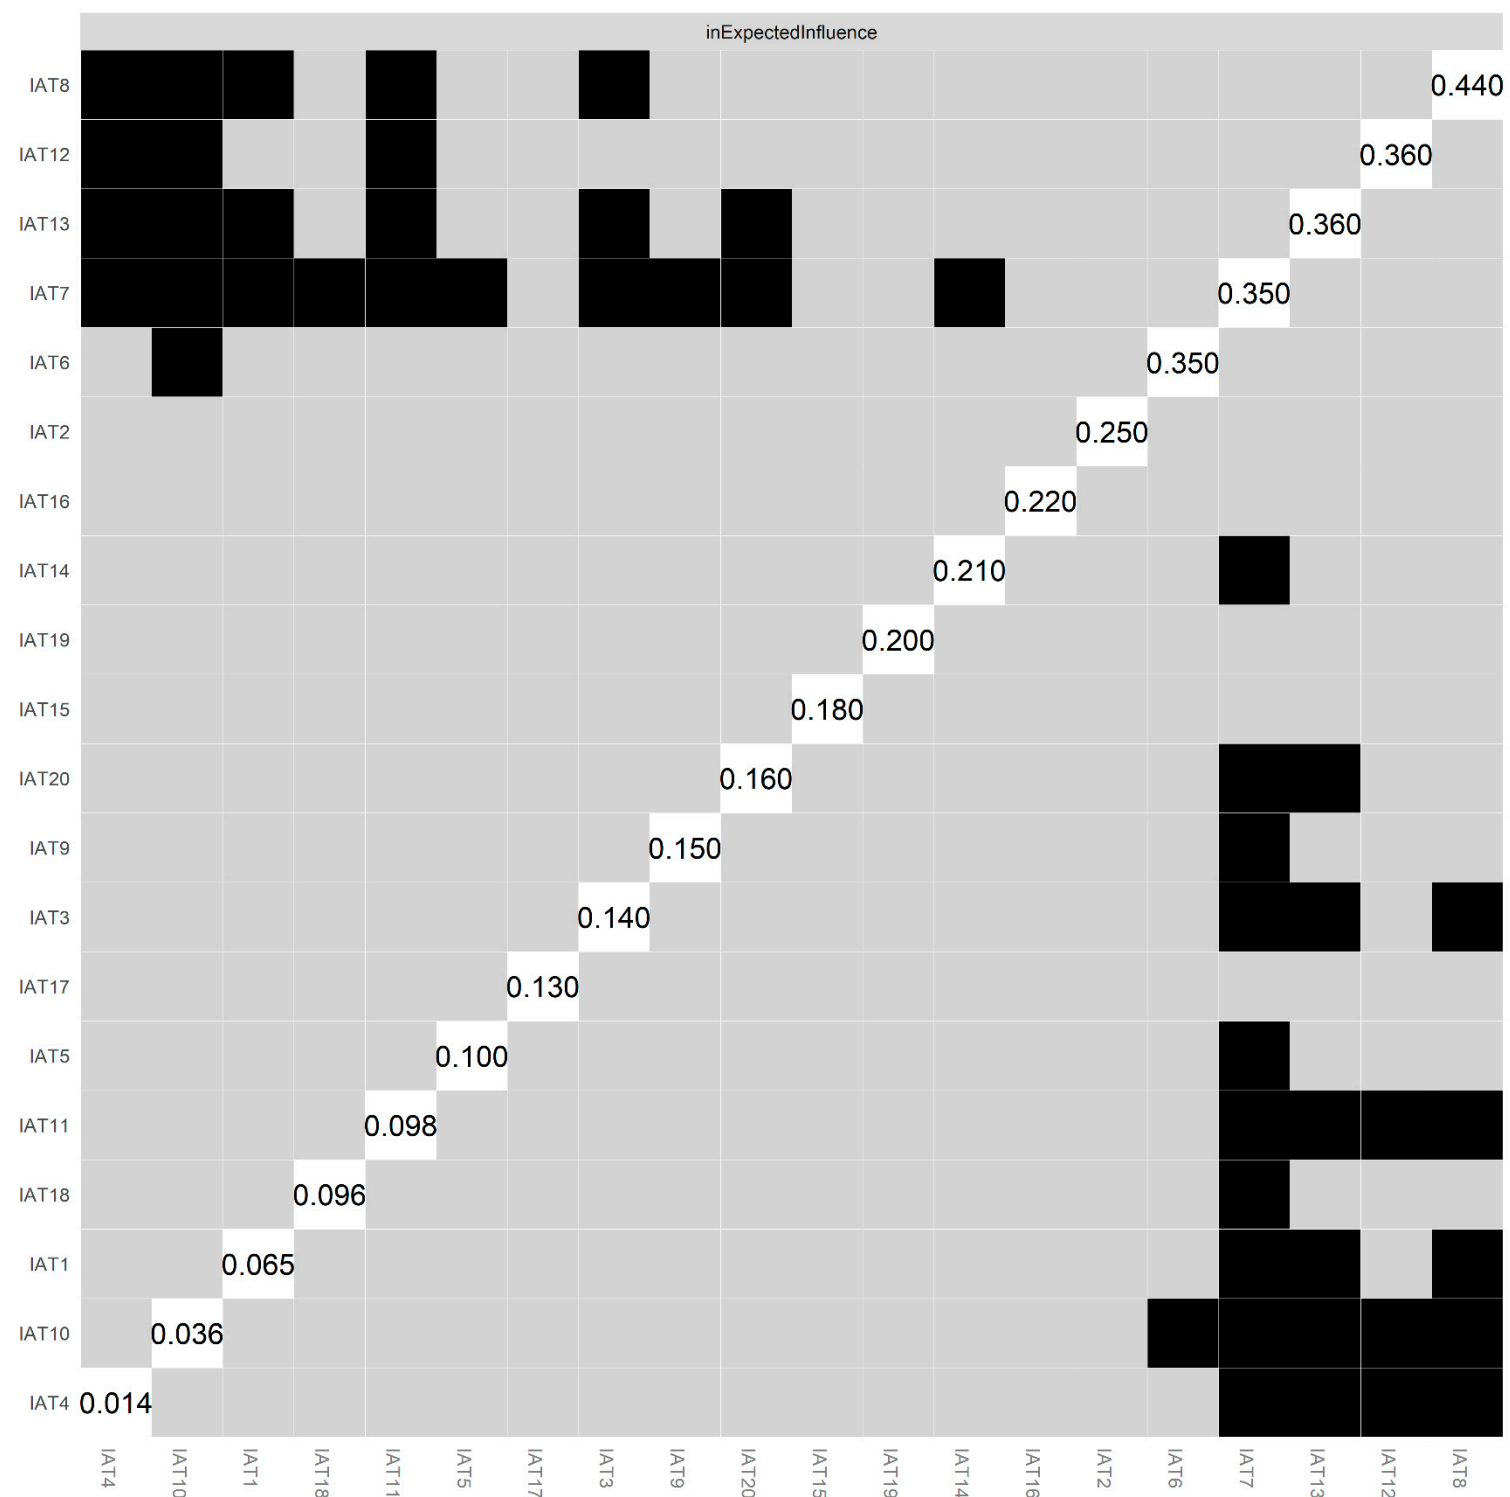

Figure S3. Nonparametric bootstrapped difference test for each node's centrality index (inExpectedInfluence). Grey boxes indicate no significant difference, whereas black boxes indicate a statistically significant difference ( $p < 0.05$ ).

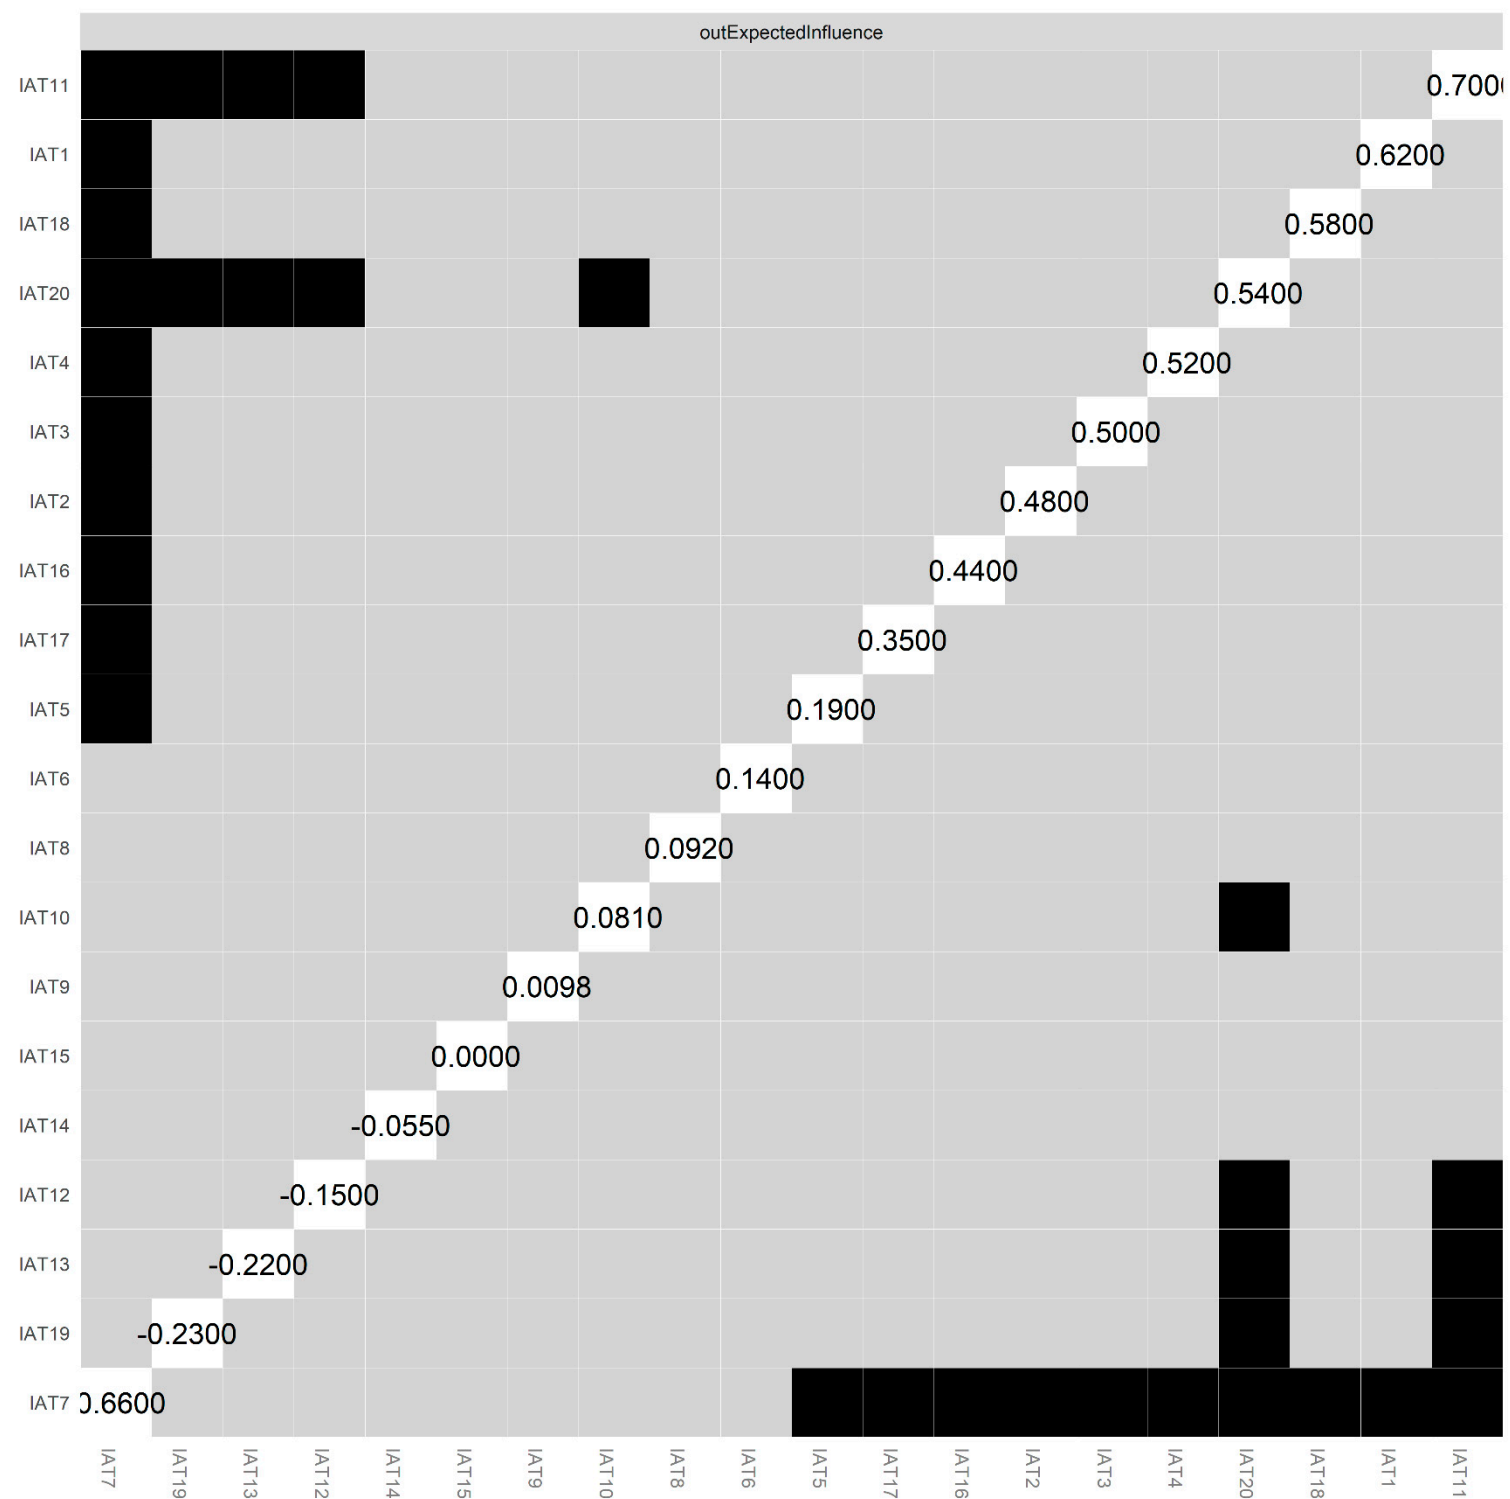

Figure S4. Nonparametric bootstrapped difference test for each node's centrality index (outExpectedInfluence). Grey boxes indicate no significant difference, whereas black boxes indicate a statistically significant difference ( $p < 0.05$ ).
